# Supplementary material
Source: PubMed Central journal article supplement (PMC7613789)
Supplement: EMS150004-supplement-Source_Data_Fig__1.pdf [file EMS150004-supplement-Source_Data_Fig__1.pdf]

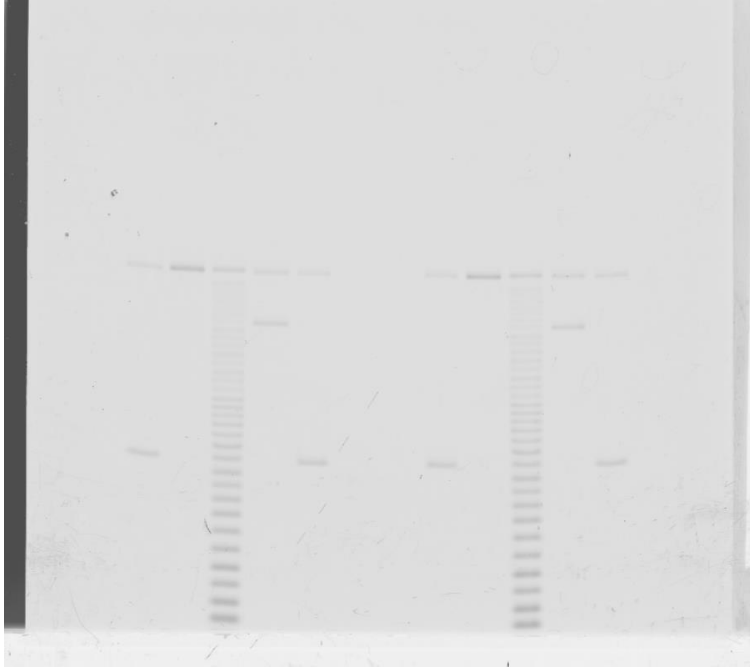

Source data for Fig 1b

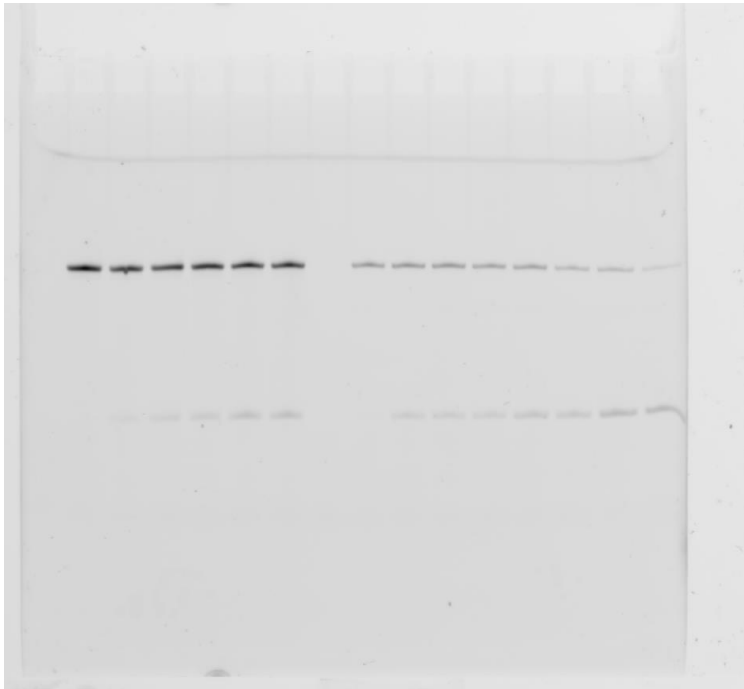

Source data for Fig 1c

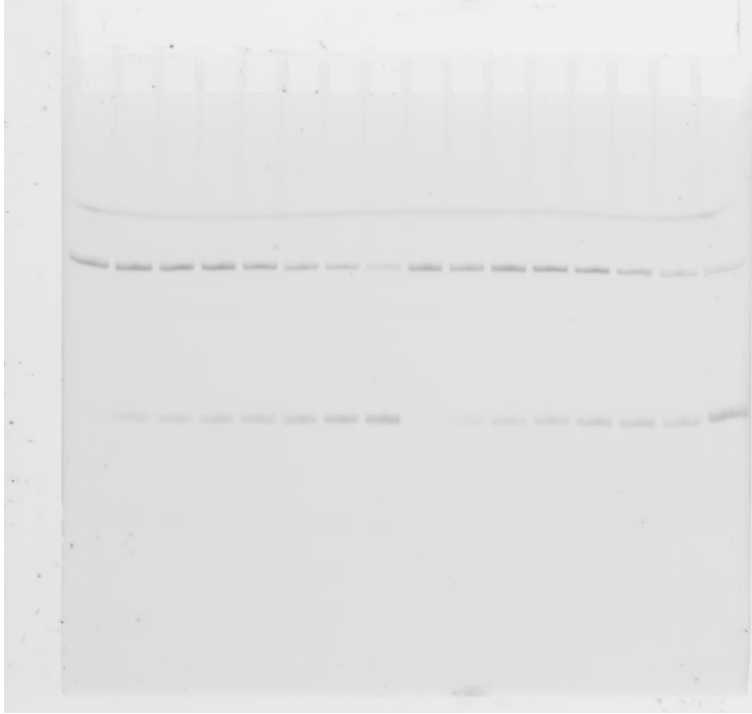

Source data for Fig 1c

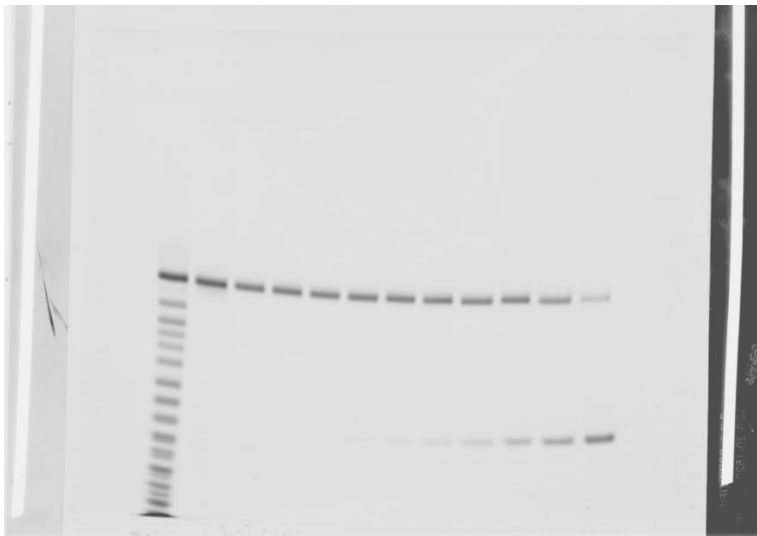

Source data for Fig 1d

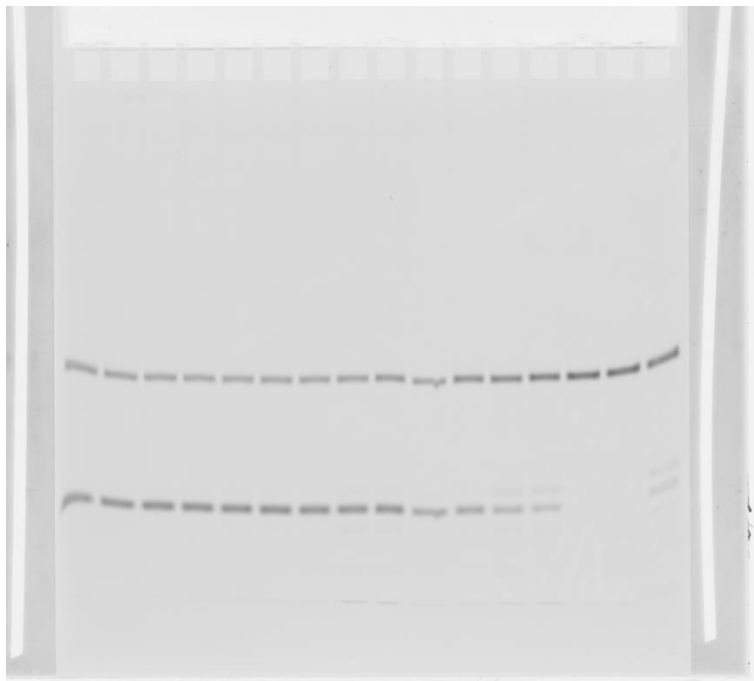

Source data for Fig 1e

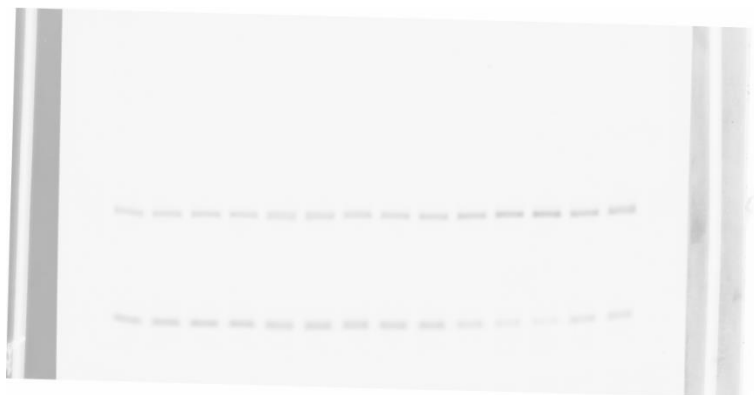

Source data for Fig 1f

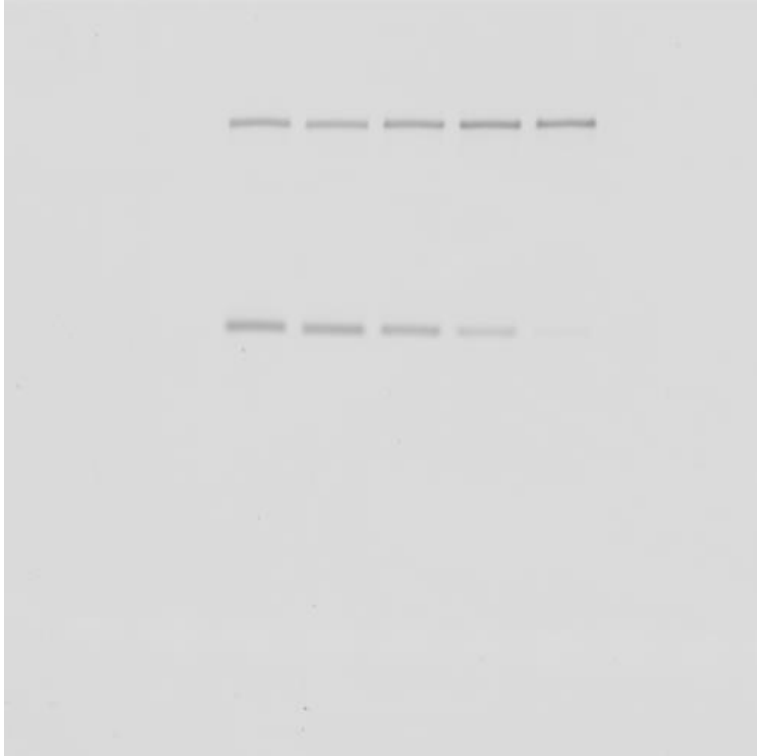

Source data for Fig 1f
