# Supplementary material
Source: PubMed Central journal article supplement (PMC7613789)
Supplement: EMS150004-supplement-Source_Data_Fig__2.pdf [file EMS150004-supplement-Source_Data_Fig__2.pdf]

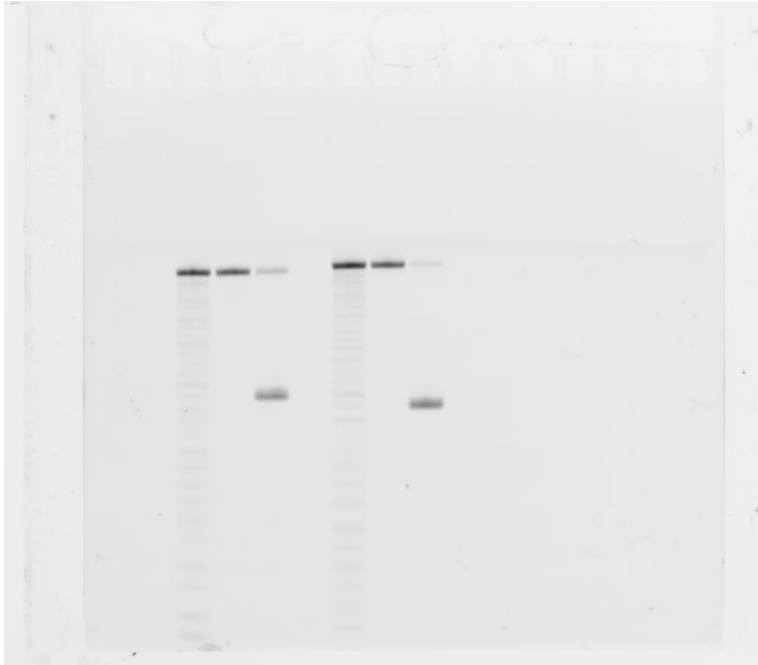

Source data for Fig 2a and 2b

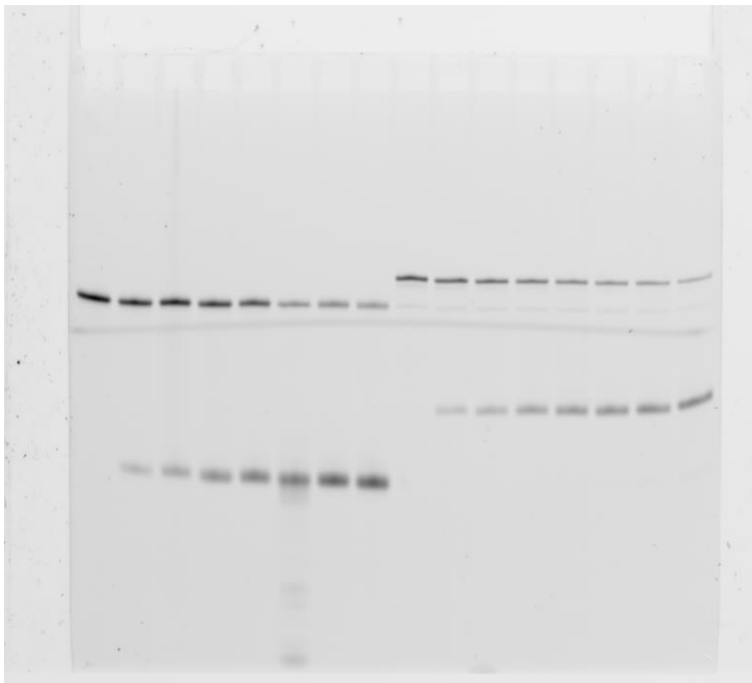

Source data for Fig 2a

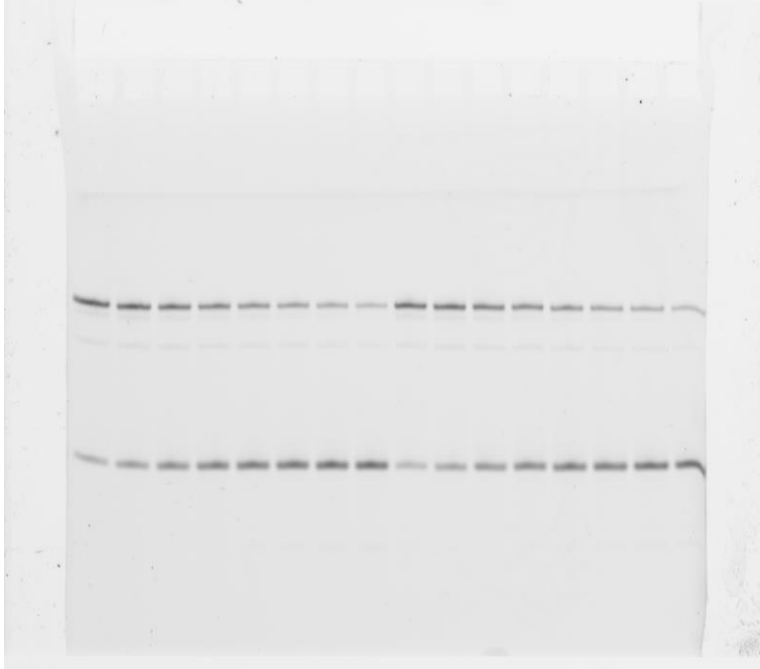

Source data for Fig 2a

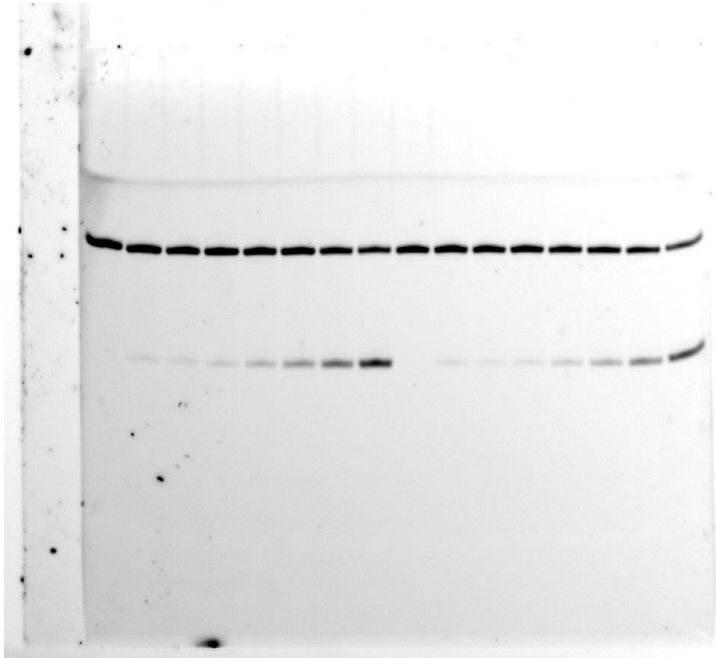

Source data for Fig 2a

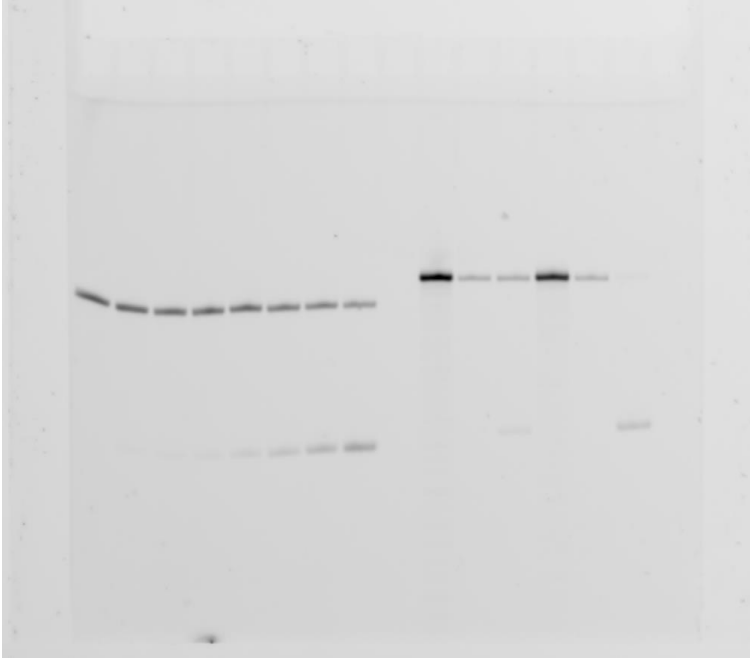

Source data for Fig 2a

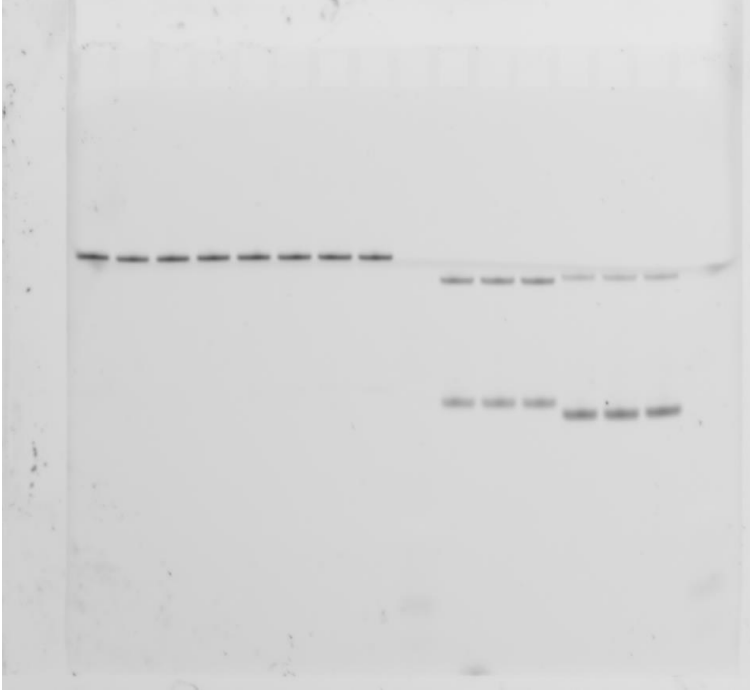

Source data for Fig 2a

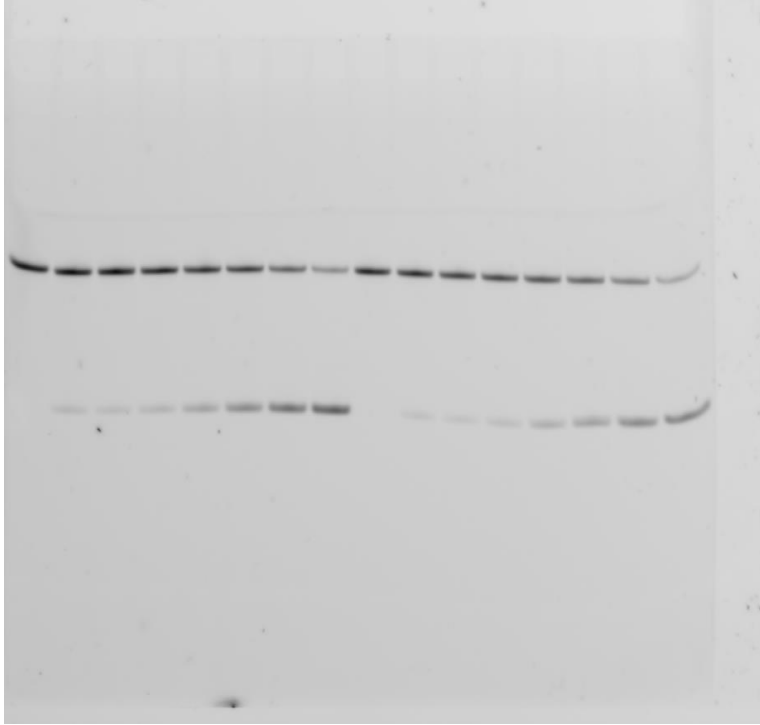

Source data for Fig 2b

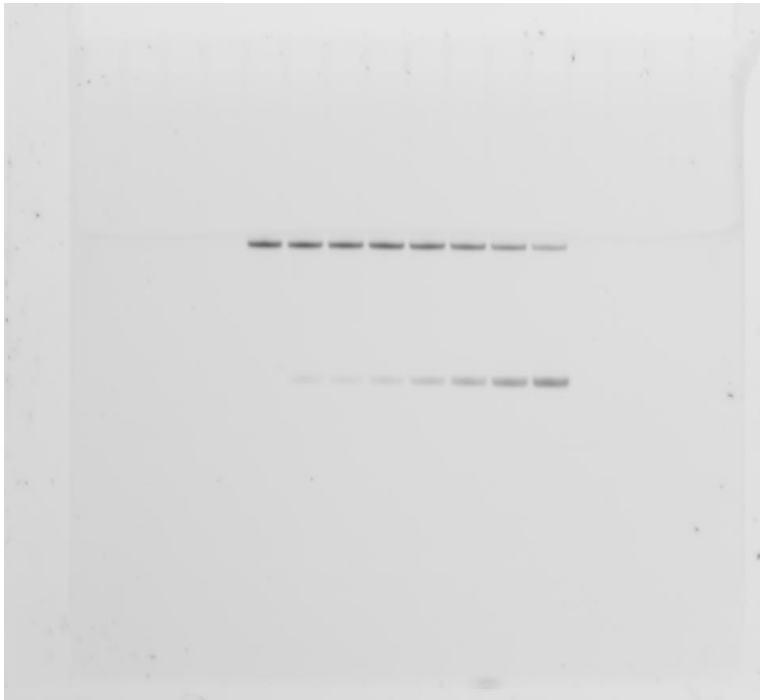

Source data for Fig 2b

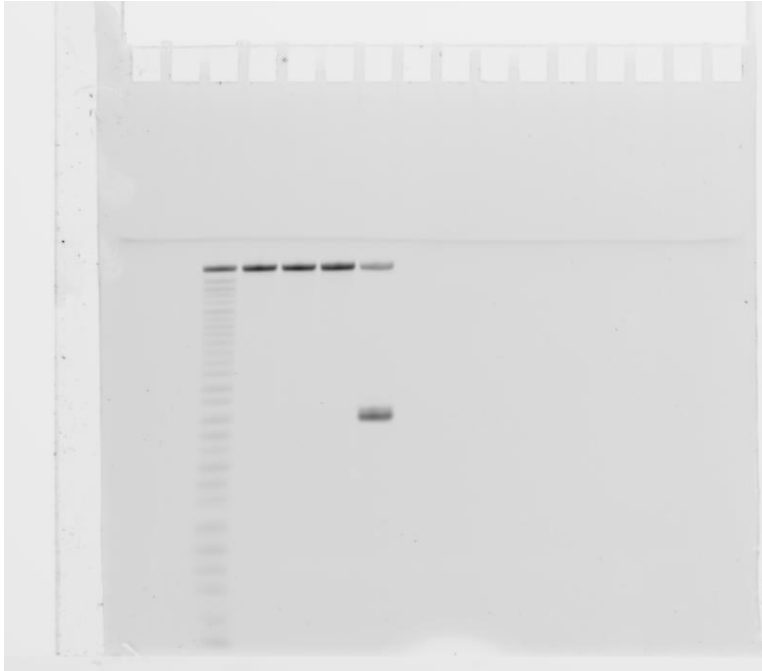

Source data for Fig 2c

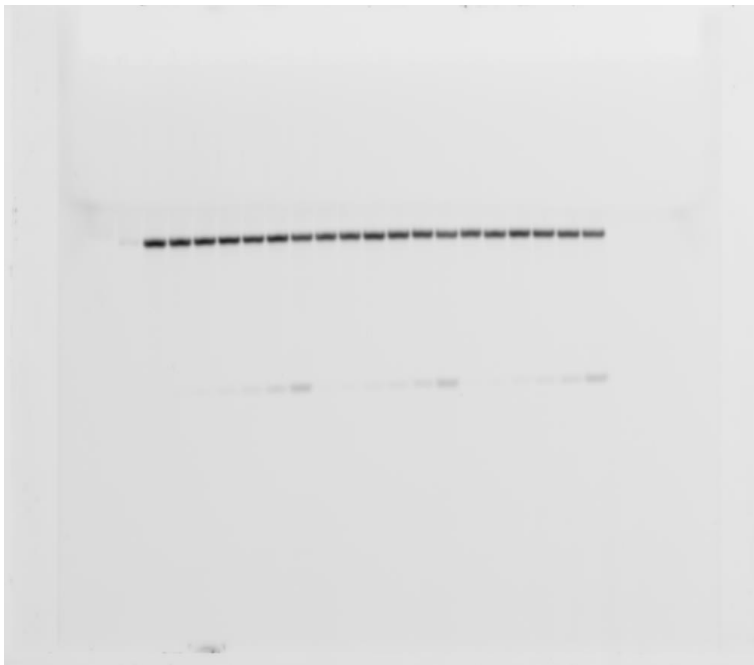

Source data for Fig 2c

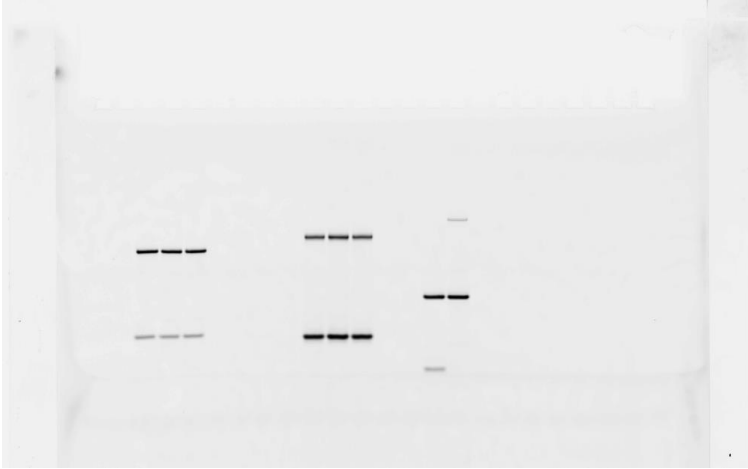

Source data for Fig 2c

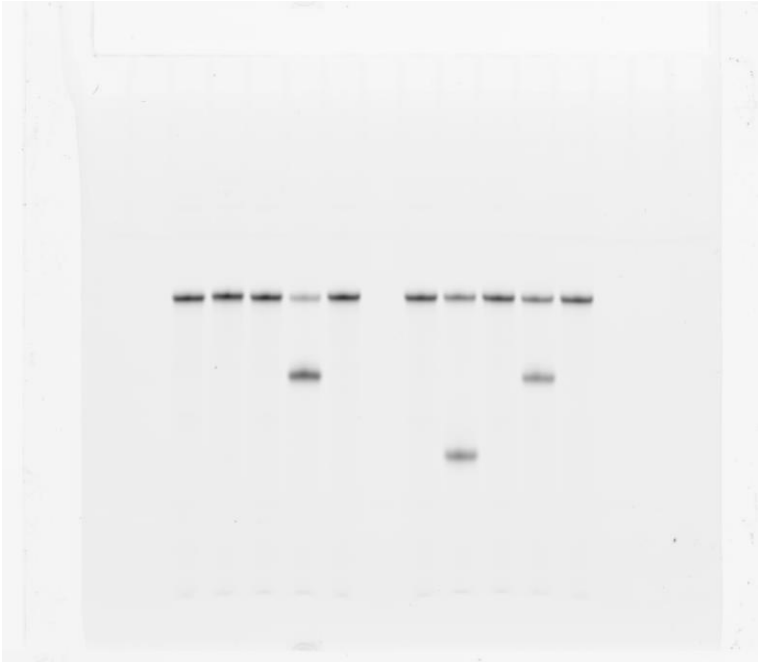

Source data for Fig 2d

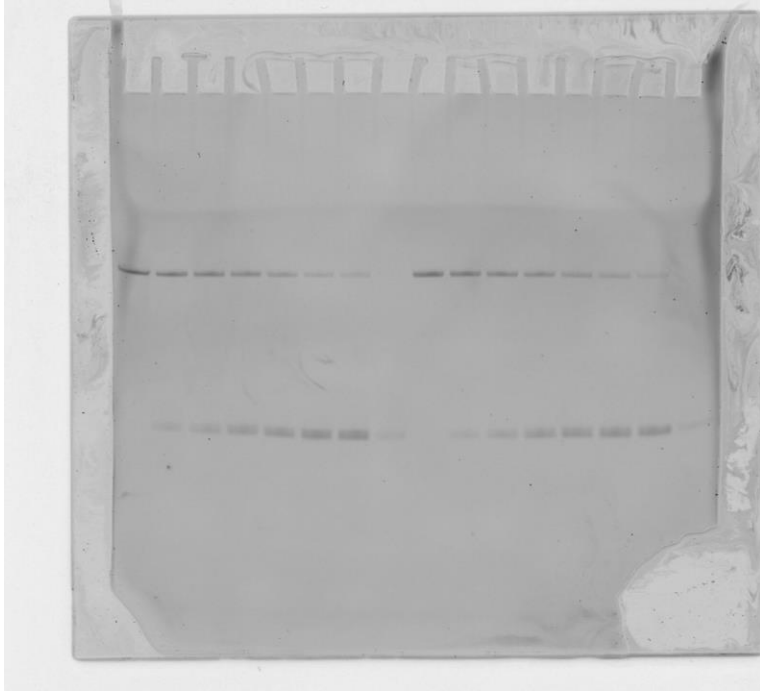

Source data for Fig 2d

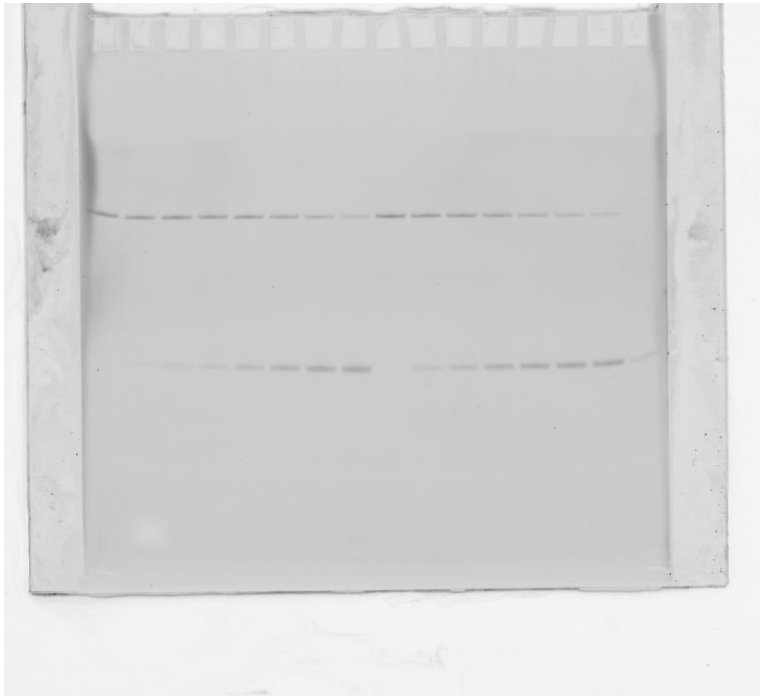

Source data for Fig 2d
